# Supplementary material
Source: PubMed Central journal article supplement (PMC4829343)

**Figure S1, related to Figure 1**

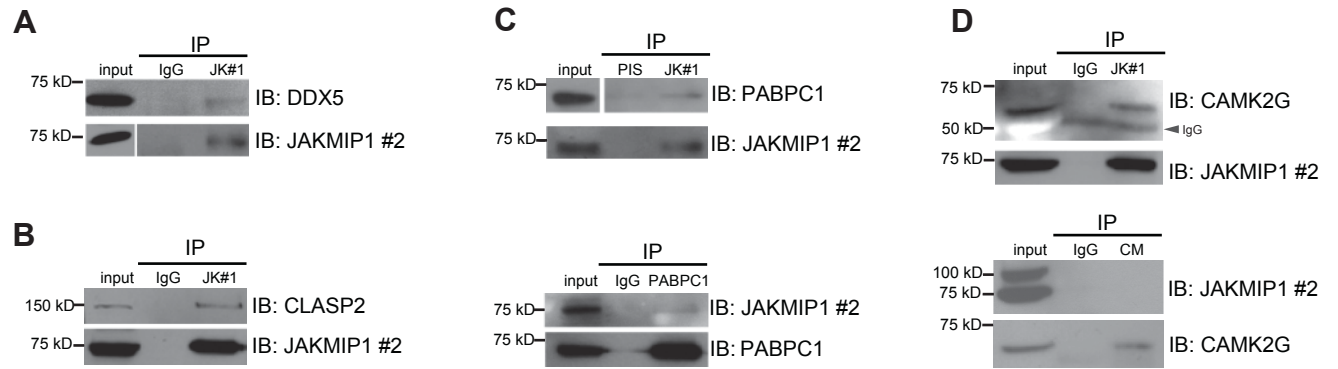

Supplement: NIHMS733250-supplement-Supp_Fig_1.pdf [file NIHMS733250-supplement-Supp_Fig_1.pdf]

**Figure S2, related to Figure 2**

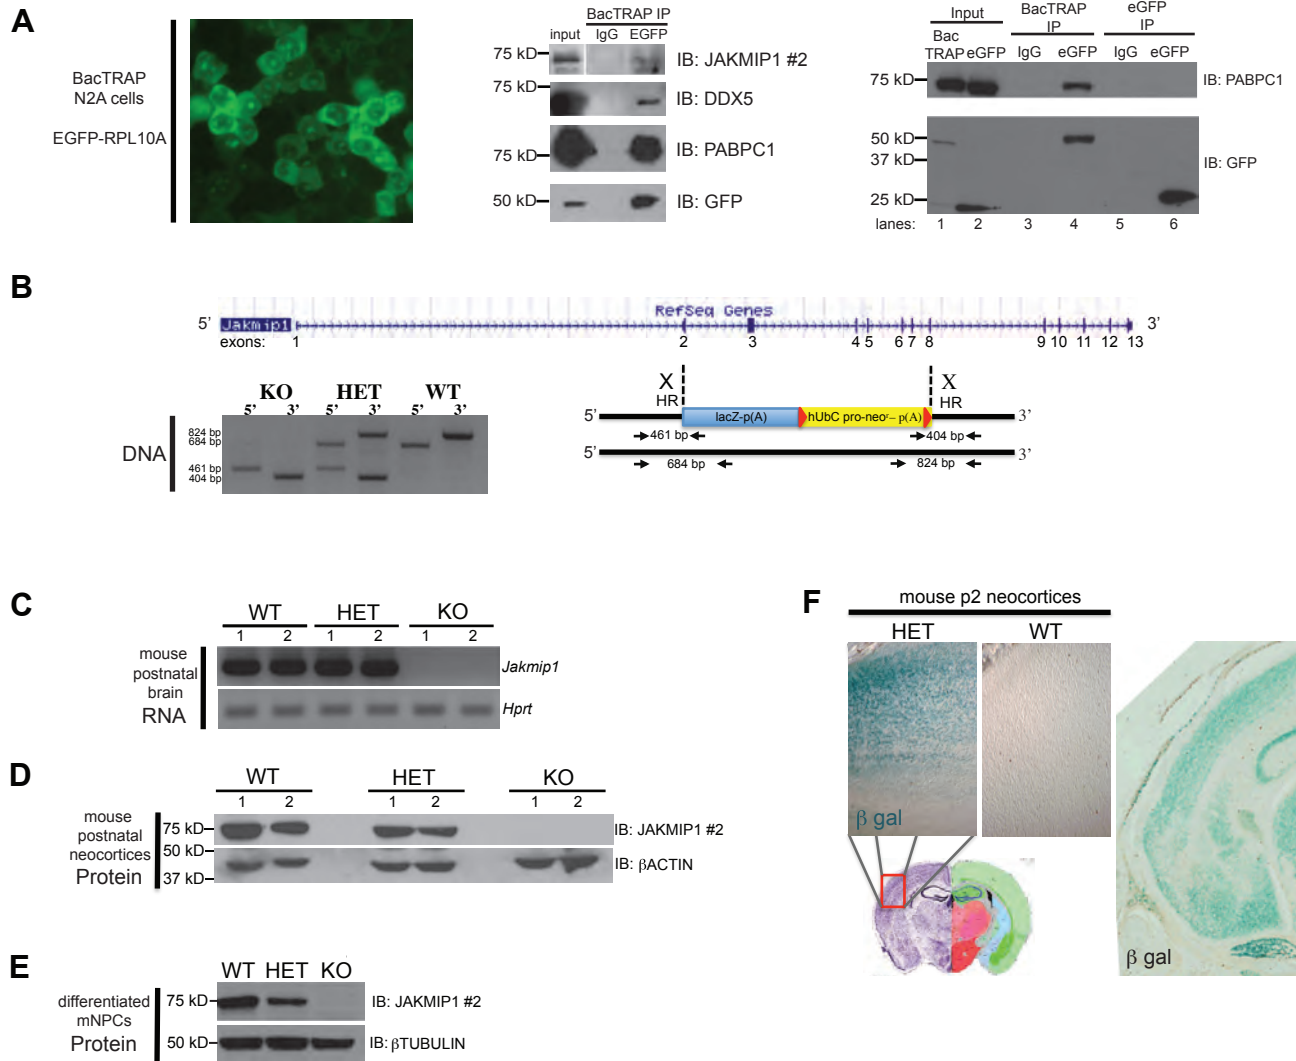

Supplement: NIHMS733250-supplement-Supp_Fig_2.pdf [file NIHMS733250-supplement-Supp_Fig_2.pdf]

**Figure S3, related to Table 2**

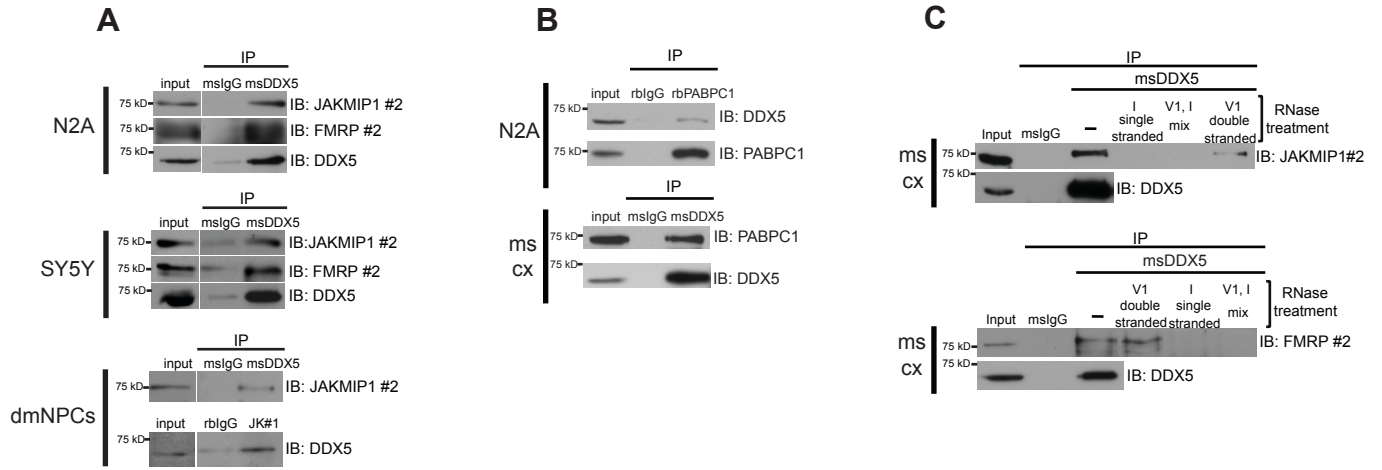

Supplement: NIHMS733250-supplement-Supp_Fig_3.pdf [file NIHMS733250-supplement-Supp_Fig_3.pdf]

Figure S4, related to Figure 2

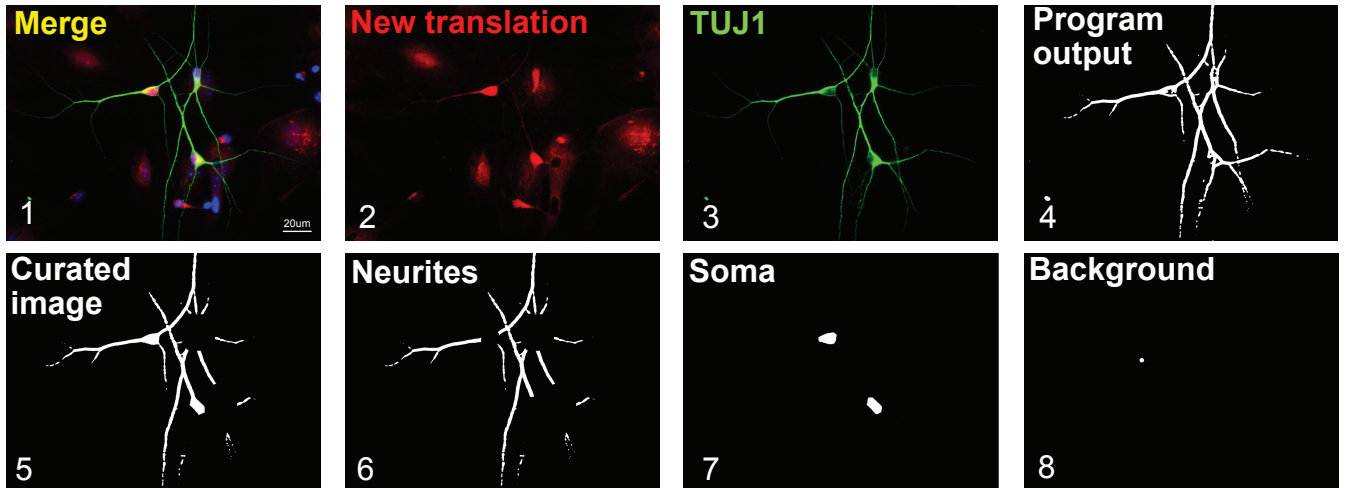

Supplement: NIHMS733250-supplement-Supp_Fig_4.pdf [file NIHMS733250-supplement-Supp_Fig_4.pdf]

**Figure S5, related to Figure 3**

**A**

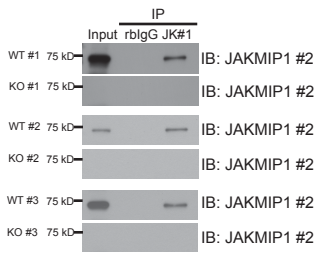

**B**

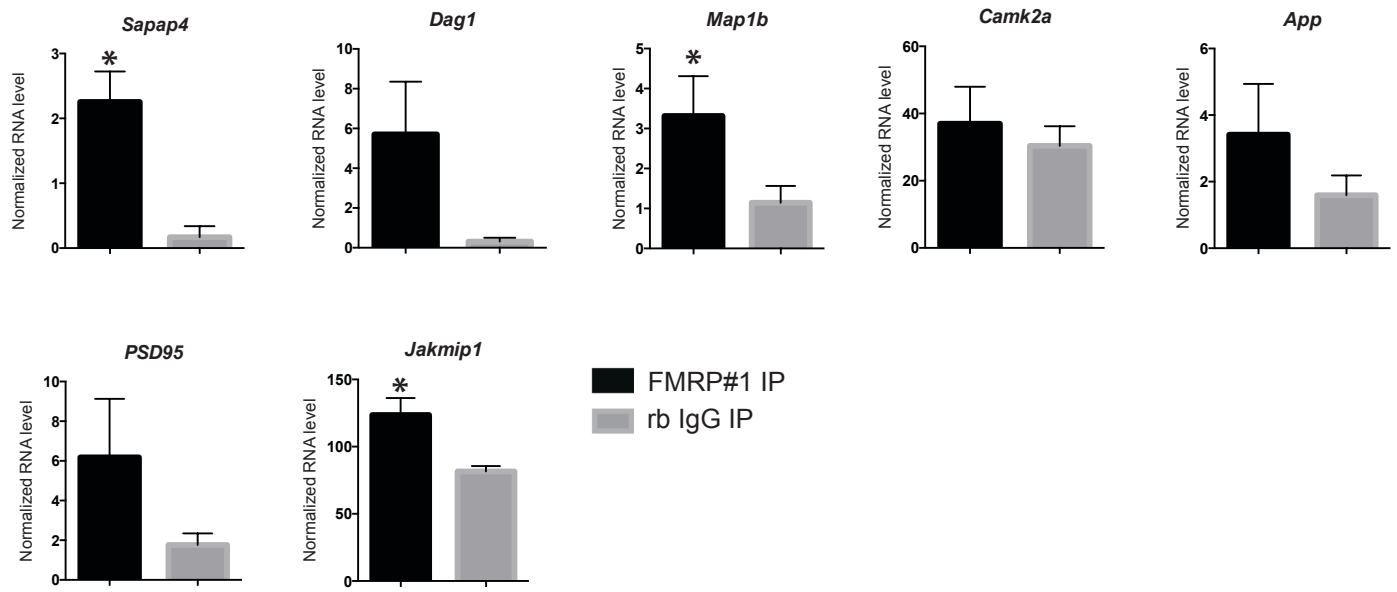

**C**

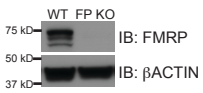

**D**

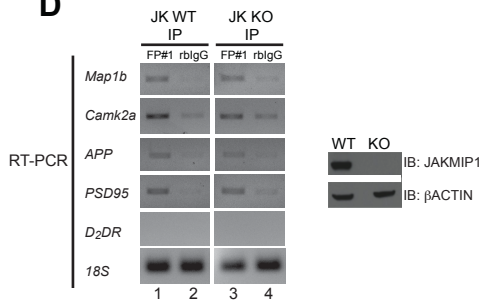

Supplement: NIHMS733250-supplement-Supp_Fig_5.pdf [file NIHMS733250-supplement-Supp_Fig_5.pdf]

Figure S6, related to Figure 3

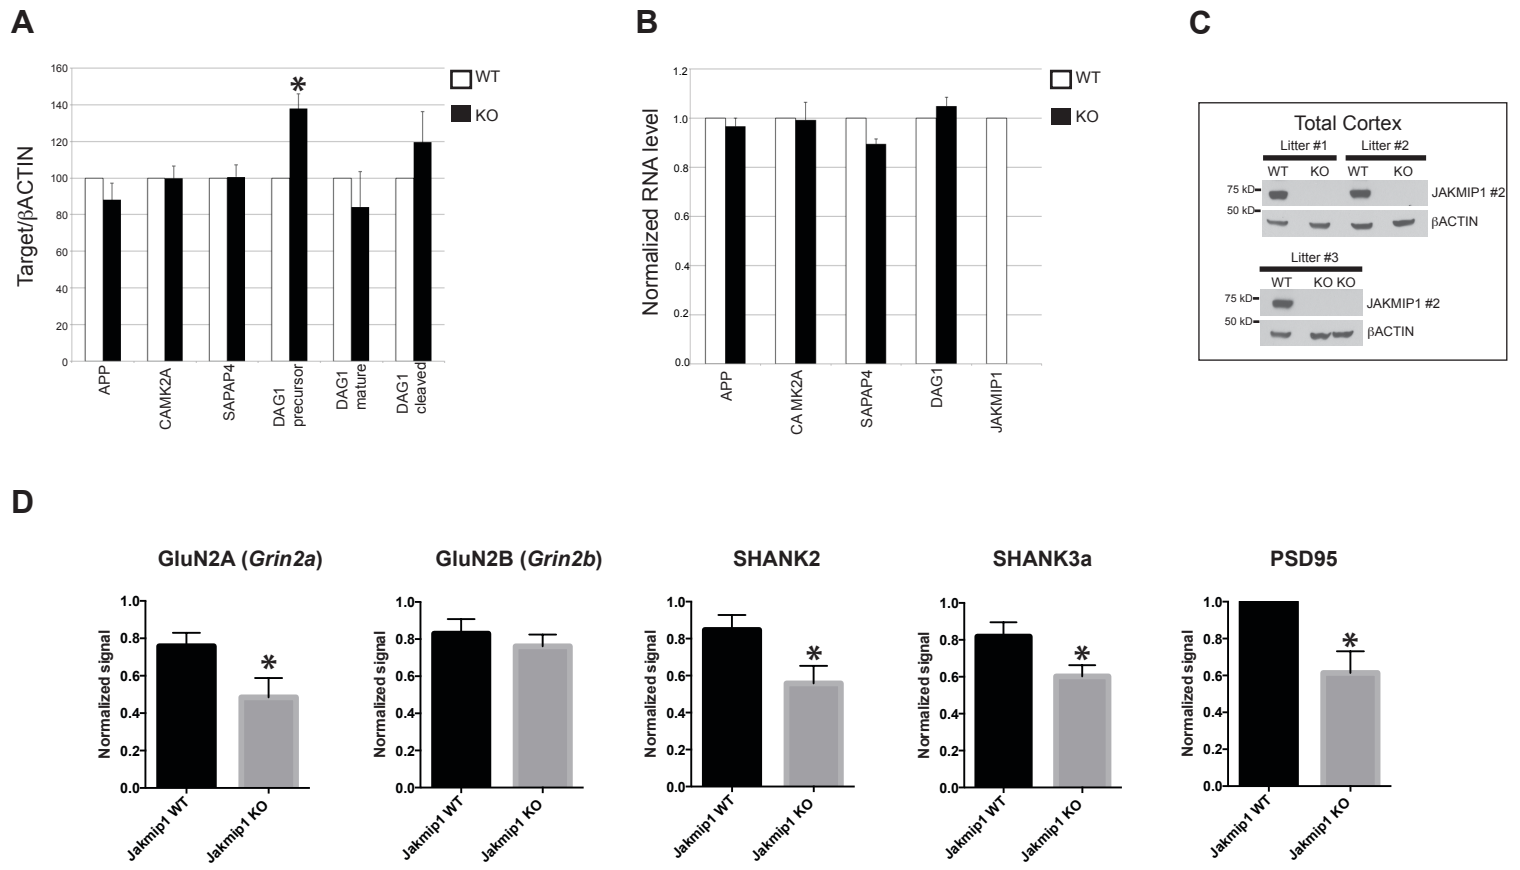

Supplement: NIHMS733250-supplement-Supp_Fig_6.pdf [file NIHMS733250-supplement-Supp_Fig_6.pdf]

Figure S7, related to Figure 4

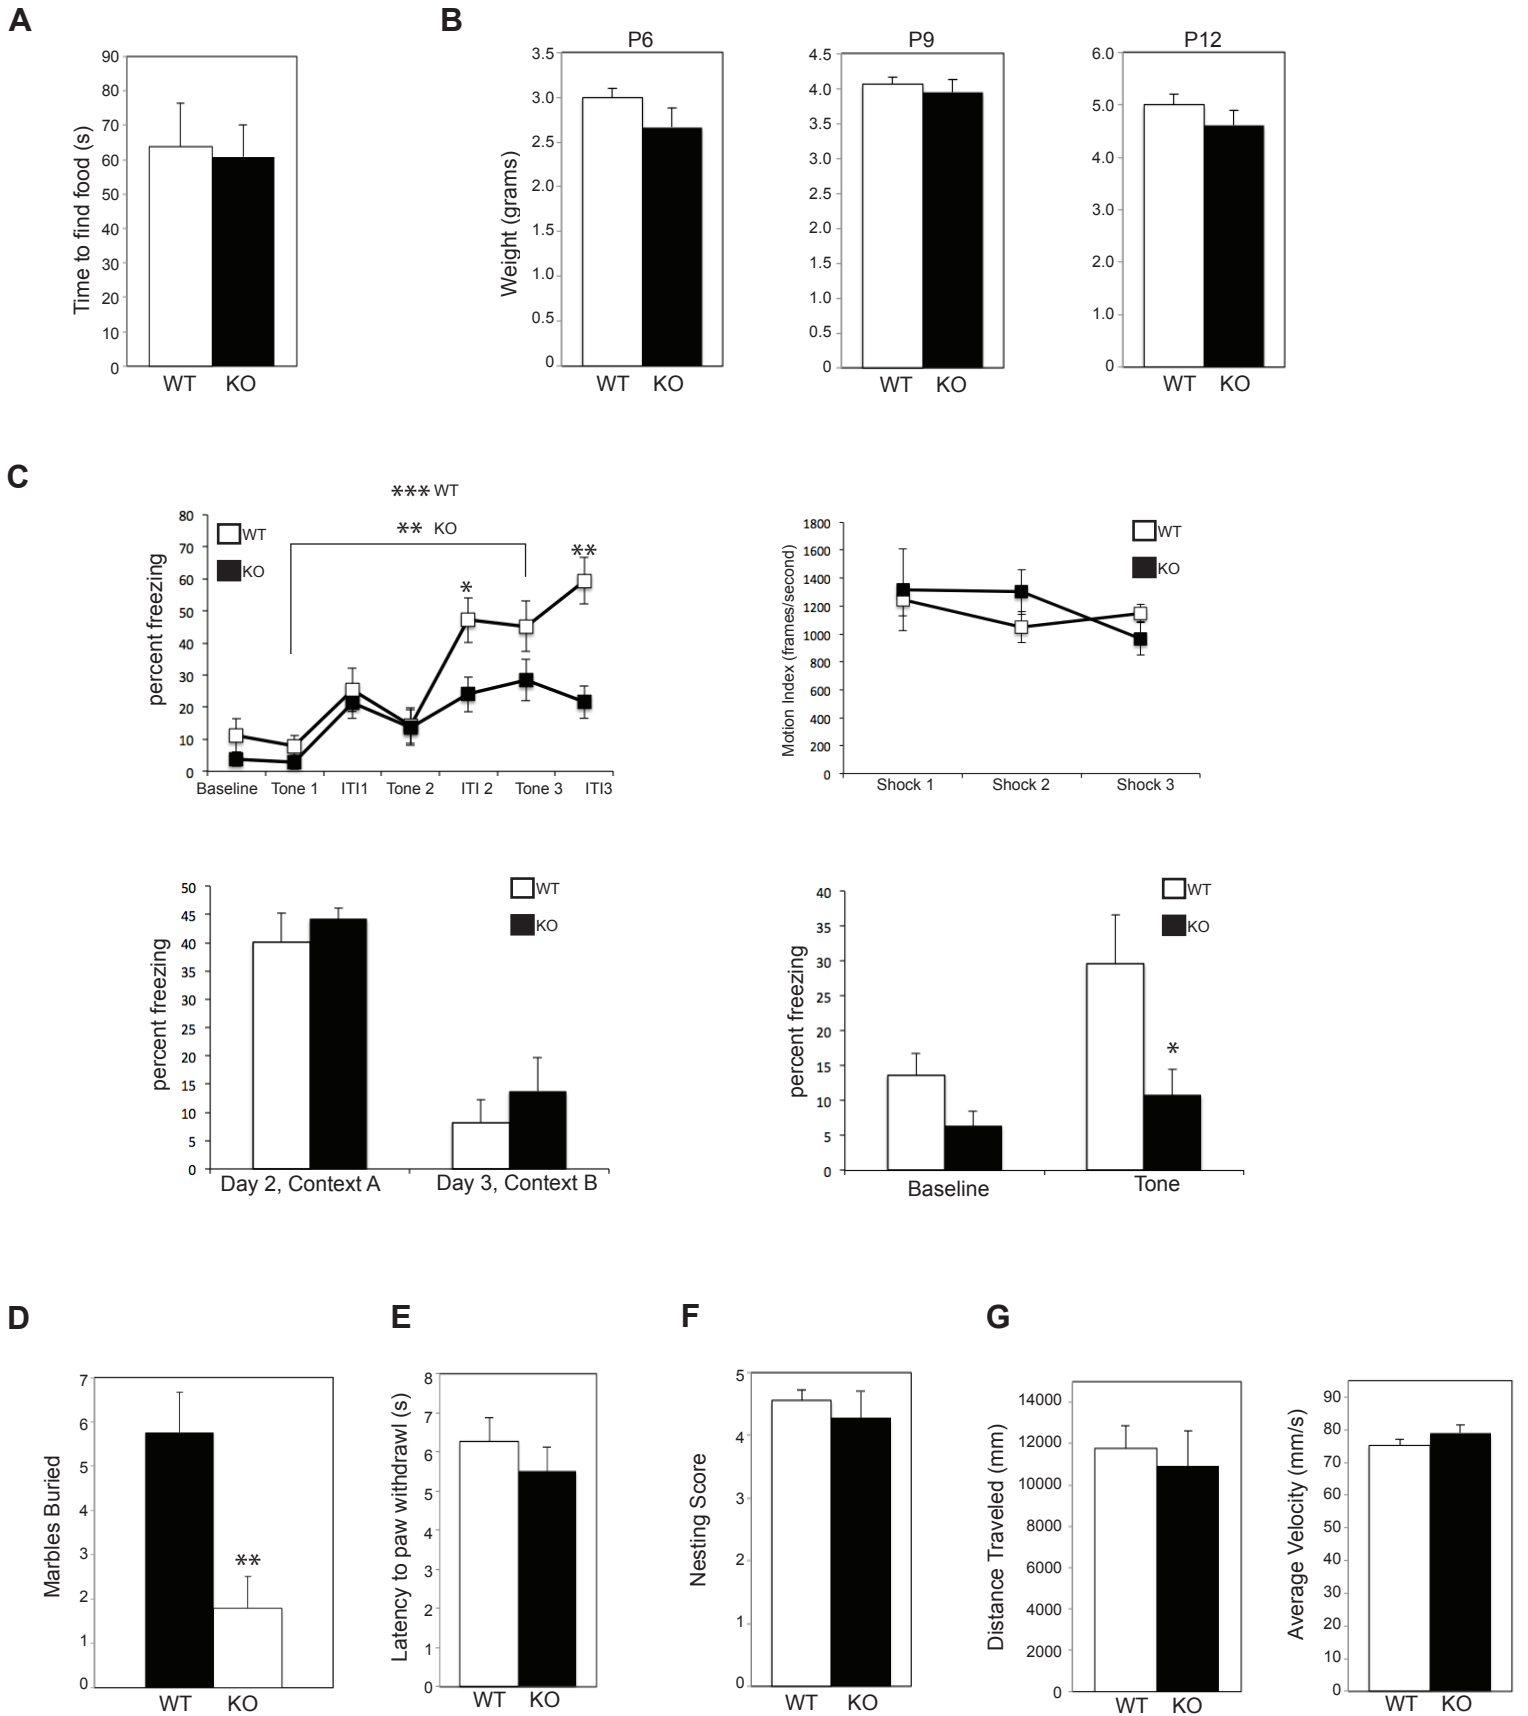

Supplement: NIHMS733250-supplement-Supp_Fig_7.pdf [file NIHMS733250-supplement-Supp_Fig_7.pdf]

## Supplemental Images for Table 3

**A**

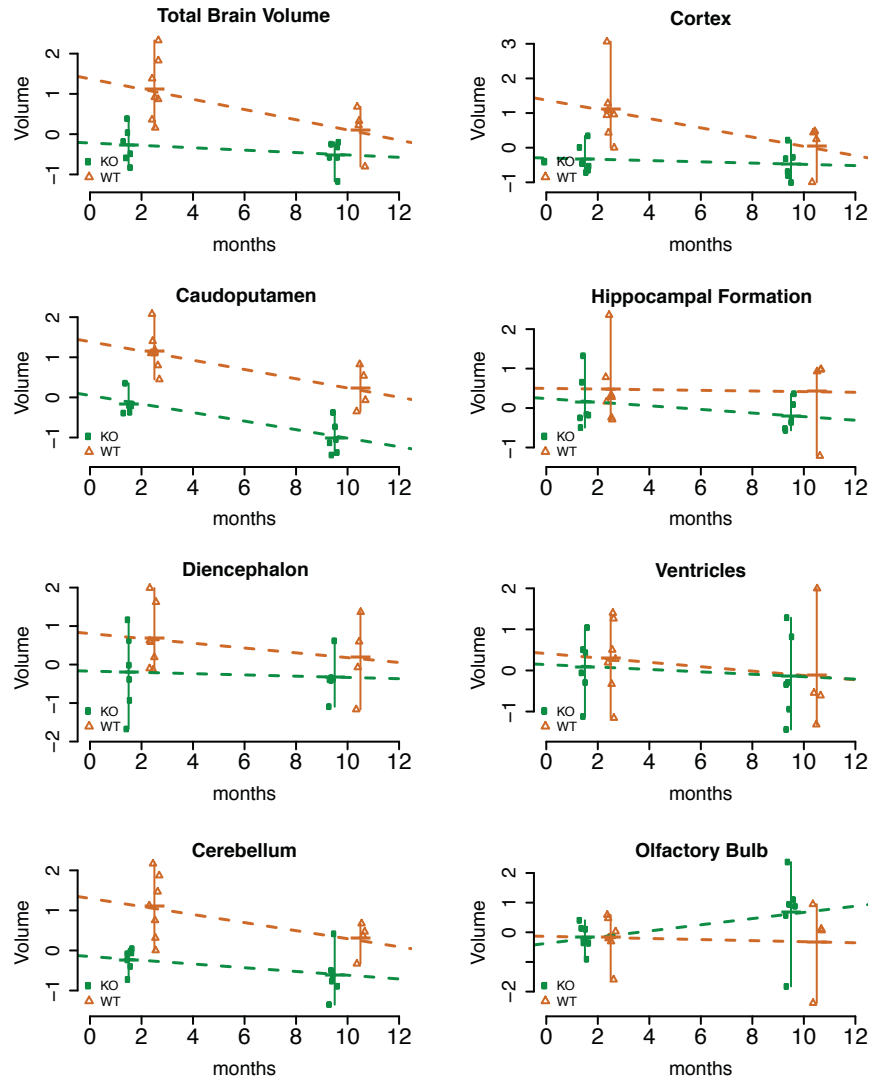

**B**

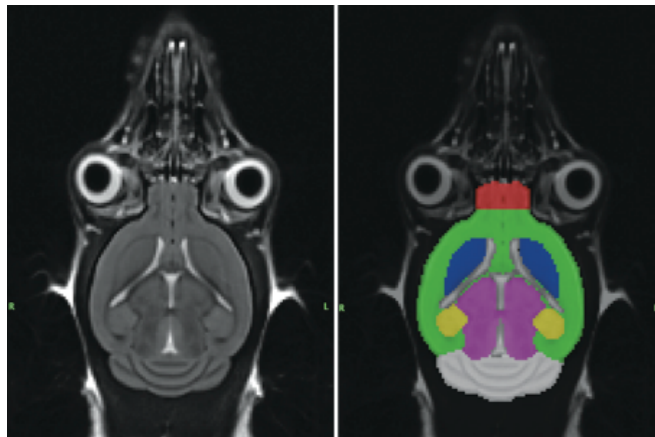

Supplement: NIHMS733250-supplement-Supporting_image.pdf [file NIHMS733250-supplement-Supporting_image.pdf]
